# Supplementary material for: Obesity may be erythropoietin dose-saving in hemodialysis patients
Source: PubMed Central journal article supplement — Kidney Res Clin Pract. 2018 Jun 30;37(2):148–56. doi: 10.23876/j.krcp.2018.37.2.148 (PMC6027808; doi:10.23876/j.krcp.2018.37.2.148), 2018-06-30
Supplement: krcp-37-148_suppl.pdf [file krcp-37-148_suppl.pdf]

**Supplementary Table 1. Correlation between hemoglobin level and patients parameters**

| Parameter                     | Hemoglobin              |         |
|-------------------------------|-------------------------|---------|
|                               | Correlation coefficient | P value |
| Age                           | −0.041                  | 0.283   |
| Gender                        | 0.060                   | 0.115   |
| Body mass index               | 0.047                   | 0.220   |
| Dialysis duration             | 0.001                   | 0.118   |
| Albumin                       | 0.103                   | 0.037   |
| Urea reduction ratio          | 0.076                   | 0.059   |
| Serum creatinine              | 0.166                   | 0.000   |
| Parathyroid hormone           | −0.115                  | 0.019   |
| Serum ferritin                | 0.029                   | 0.605   |
| TSAT                          | 0.214                   | 0.014   |
| Iron dose                     | 0.205                   | 0.153   |
| ESAs (unit/kg body weight/wk) | −0.731                  | 0.000   |

ESA, erythropoiesis-stimulating agent; TSAT, transferrin saturation.

**Supplementary Table 2. Correlation between weekly ESAs dose and patients parameters**

| Parameter            | EPO (unit/kg body weight/wk) |                 |
|----------------------|------------------------------|-----------------|
|                      | Correlation coefficient      | Sig. (2-tailed) |
| Age                  | −0.159                       | 0.004           |
| Gender               | −0.077                       | 0.172           |
| Body mass index      | −0.467                       | 0.000           |
| Dialysis duration    | 0.663                        | 0.023           |
| Albumin              | 0.044                        | 0.458           |
| Urea reduction ratio | −0.270                       | 0.000           |
| Hemoglobin           | −0.731                       | 0.000           |
| Serum creatinine     | −0.166                       | 0.003           |
| Parathyroid hormone  | 0.117                        | 0.545           |
| Serum ferritin       | −0.051                       | 0.487           |
| TSAT                 | 0.090                        | 0.225           |
| Iron dose            | 0.729                        | 0.037           |

ESA, erythropoiesis-stimulating agent; TSAT, transferrin saturation.
